# Supplementary material
Source: PubMed Central journal article supplement (PMC11028874)
Supplement: 262_2013_1436_MOESM1_ESM.pdf [file 262_2013_1436_MOESM1_ESM.pdf]

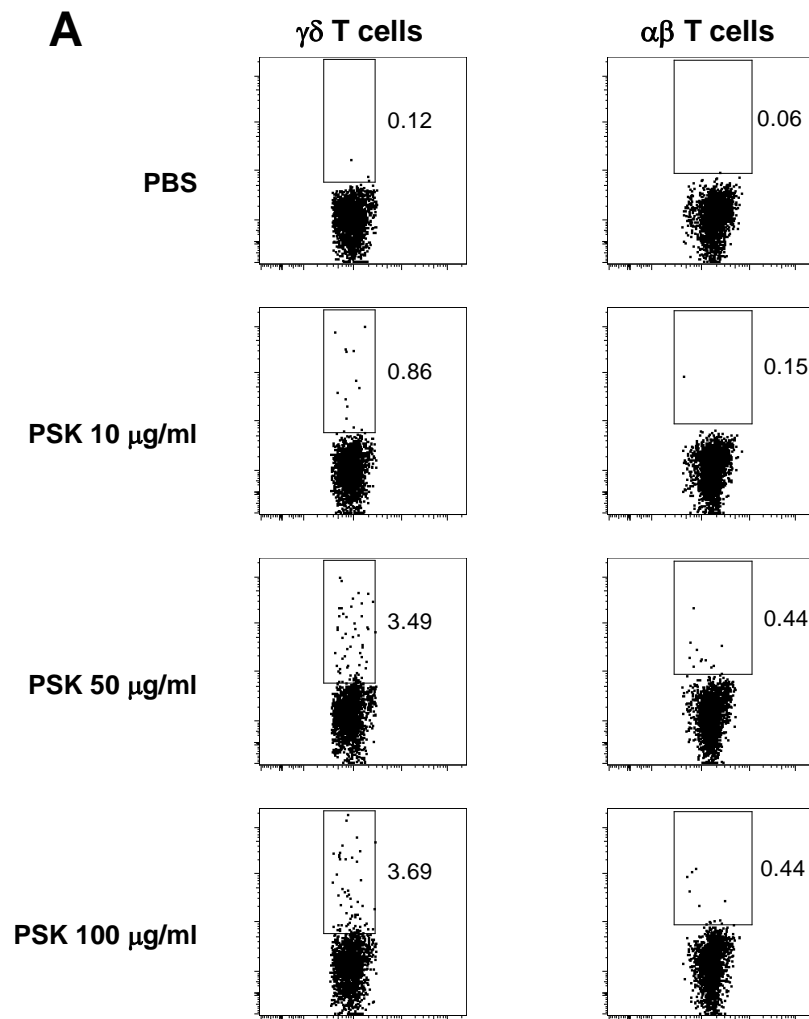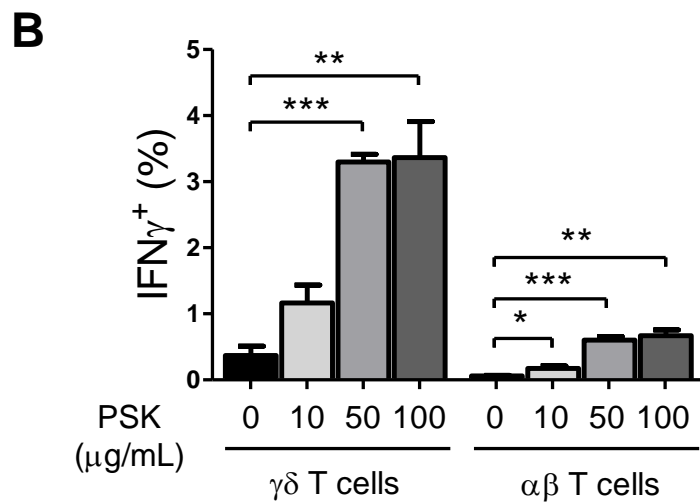

**Supplemental Figure 1.** Dose-response of PSK-induced IFN- $\gamma$  production in  $\gamma\delta$  and  $\alpha\beta$  T cells. Freshly isolated splenocytes from neu-tg mice were treated with PSK (0, 10, 50, or 100  $\mu\text{g/mL}$ ) for 48 hrs. Brefeldin A was included during the last 16 hours of the incubation. Then the level of intracellular IFN- $\gamma$  was measured by FACS. (A) Representative dot plots of IFN- $\gamma$  expression in  $\gamma\delta$  or  $\alpha\beta$  T cells from one experiment. (B) Bar graph of PSK-induced IFN- $\gamma$  production in  $\gamma\delta$  and  $\alpha\beta$  T cells. Each bar represents mean $\pm$ sem of three independent experiments. \*,  $p < 0.05$ , \*\*,  $p < 0.01$ , \*\*\*,  $p < 0.001$ .

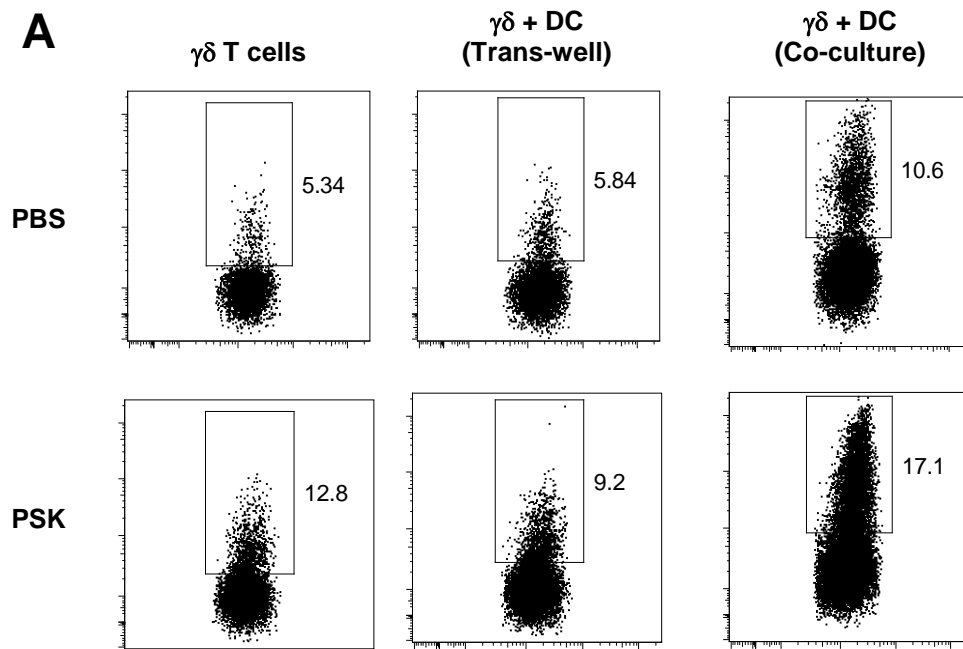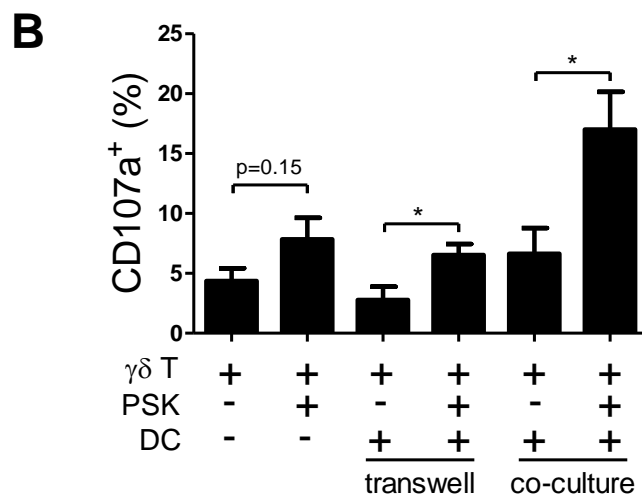

**Supplemental Figure 2.** PSK induces CD107a expression in  $\gamma\delta$  T cells. (A) Representative dot plots showing the expression of CD107a in control PBS and PSK-treated  $\gamma\delta$  T cells in different culture systems:  $\gamma\delta$  T cell alone,  $\gamma\delta$ +DC trans-well culture, or  $\gamma\delta$ +DC co-culture. (B) Bar graph summarizing the percentage of CD107a<sup>+</sup>  $\gamma\delta$  T cells in PBS and PSK-treated  $\gamma\delta$  T cells in different culture systems. Each bar represents mean $\pm$ sem of four independent experiments. \*,  $p < 0.05$ , by Student *t* test.

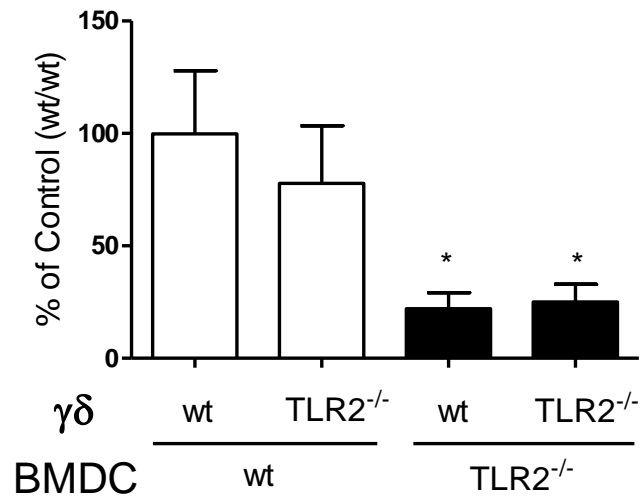

**Supplemental Figure 3.** PSK-induced  $\gamma\delta$  T cell activation is dependent on TLR2.  $\gamma\delta$  T cells and BMDC from TLR2<sup>-/-</sup> mice or wild type (wt) C57/BL6 mice were stimulated with PSK (100  $\mu$ g/ml) for 48 hours. Then the culture supernatant was collected and the level of IFN- $\gamma$  was measured by ELISA. The level of IFN- $\gamma$  in control (wt  $\gamma\delta$  T cells and wt BMDC) was set to 100% and the levels of IFN- $\gamma$  in other culture conditions were shown as the percentage of control. Data shown are representative of 5 independent experiments (mean $\pm$ sem). \*, p<0.05 from control, by Student t test.
